# Supplementary material for: COPD-Type lung inflammation promotes K-ras mutant lung cancer through epithelial HIF-1α mediated tumor angiogenesis and proliferation
Source: PubMed Central journal article supplement (PMC6152479; doi:10.18632/oncotarget.26030), 2018-08-31
Supplement: oncotarget-09-32972-s001.pdf [file oncotarget-09-32972-s001.pdf]

## COPD-type lung inflammation promotes K-ras mutant lung cancer through epithelial HIF-1 $\alpha$ mediated tumor angiogenesis and proliferation

### SUPPLEMENTARY MATERIALS

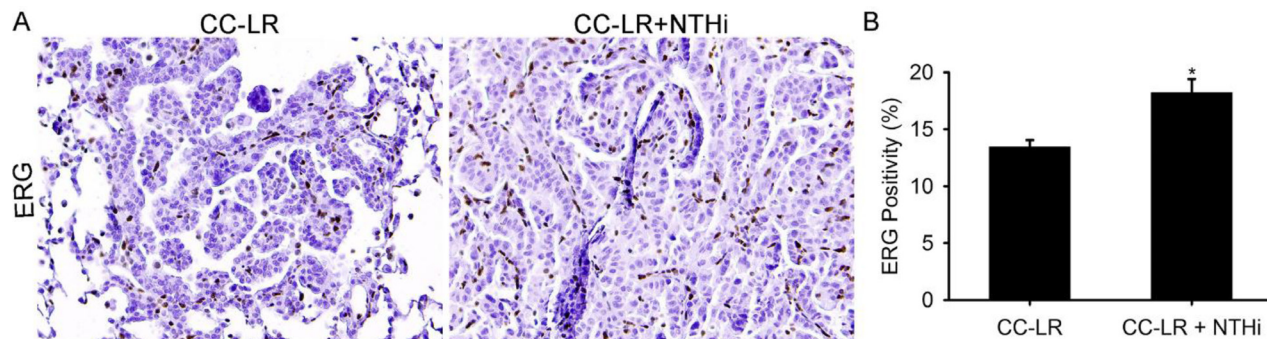

**Supplementary Figure 1:** (A) Representative photomicrographs of ERG immunolabeled lung tumor tissues of 14 weeks old CC-LR mice in the absence or presence of NTHi-induced COPD-type airway inflammation (20 $\times$  magnification). (B) Quantitative analysis of ERG positive staining in lung tissue of CC-LR mice in the absence or presence of NTHi exposure (mean  $\pm$  SE; \* =  $P \leq 0.05$  for CC-LR vs CC-LR plus NTHi;  $n = 3$ ).

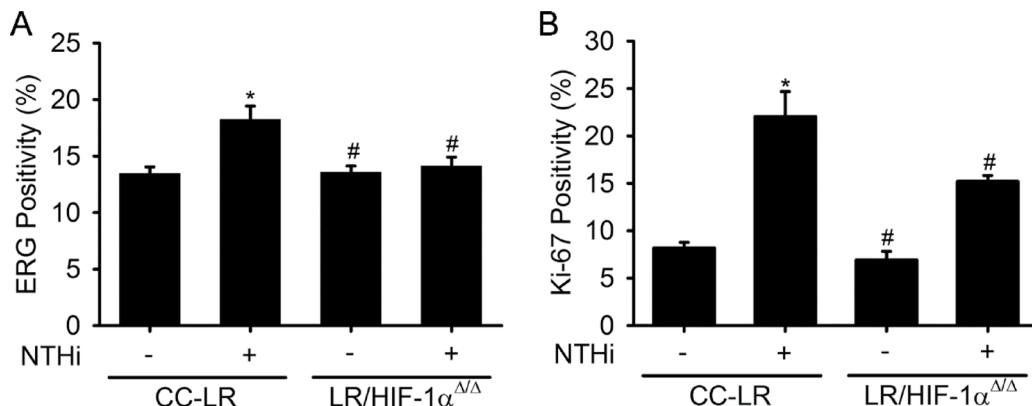

**Supplementary Figure 2:** (A) Quantitative analysis of ERG positive staining in lung tissue of CC-LR and LR/HIF-1 $\alpha^{\Delta\Delta}$  mice in the absence or presence of NTHi exposure (mean  $\pm$  SE; \* =  $P \leq 0.05$  for CC-LR vs others, and # = CC-LR plus NTHi vs others;  $n=3$ ). (B) Quantitative analysis of Ki-67 positive staining in lung tissue of CC-LR mice in the absence or presence of NTHi exposure (mean  $\pm$  SE; \* =  $P \leq 0.05$  for CC-LR vs others, and # = CC-LR plus NTHi vs others;  $n = 3$ ).

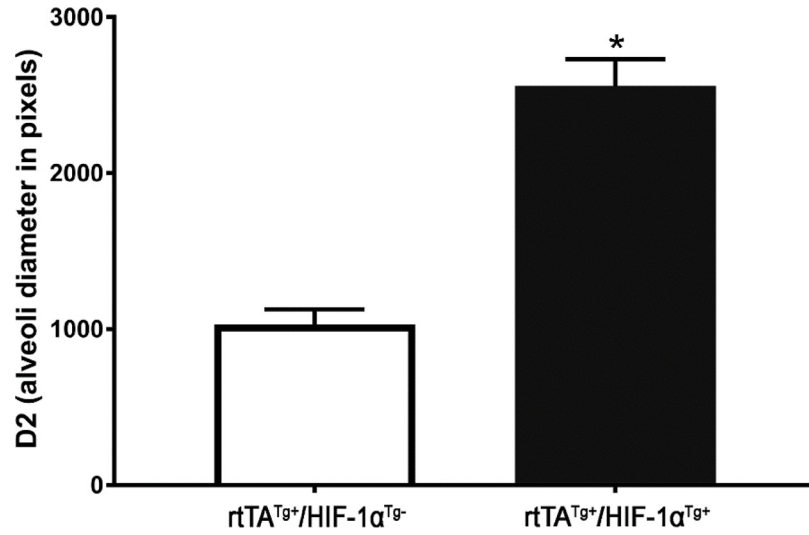

**Supplementary Figure 3:** Quantitative analysis of alveolar space diameter in lung specific HIF-1α transgenic mouse (mean ± SE; \* =  $P \leq 0.05$ ;  $n = 3$ ).

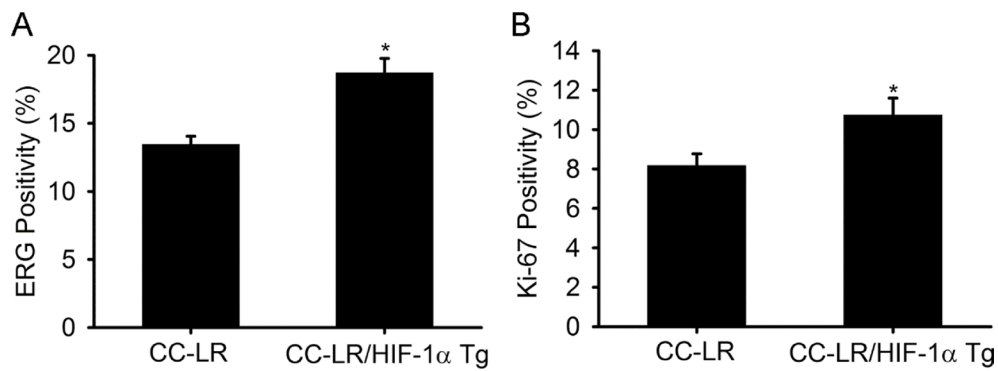

**Supplementary Figure 4:** (A) Quantitative analysis of ERG positive staining in lung tissue of CC-LR and CC-LR/HIF-1α Tg (mean ± SE; \* =  $P \leq 0.05$ ;  $n = 3$ ). (B) Quantitative analysis of Ki-67 positive staining in lung tissue of CC-LR and CC-LR/HIF-1α Tg mice (mean ± SE; \* =  $P \leq 0.05$ ;  $n = 3$ ).

**Supplementary Table 1: Summary of mouse models**

| <b>Terminology</b>                               | <b>Cross</b>                                                                             | <b>Genotype</b>                                                 |
|--------------------------------------------------|------------------------------------------------------------------------------------------|-----------------------------------------------------------------|
| CC-LR                                            | CCSP <sup>Cre</sup> /LSL-K-ras <sup>G12D</sup>                                           | Airway Specific K-ras Mutant                                    |
| LR/HIF-1 $\alpha^{\Delta\Delta}$                 | CCSP <sup>Cre</sup> /LSL-K-ras <sup>G12D</sup> /HIF-1 $\alpha^{ff}$                      | Airway Specific K-ras Mutant with lack of HIF-1 $\alpha$        |
| rtTA <sup>Tg+</sup> /HIF-1 $\alpha^{\text{Tg+}}$ | CCSP-rtTA/HIF-1 $\alpha^{\text{Tg}}$                                                     | Airway Specific HIF-1 $\alpha$ Overexpressor                    |
| CC-LR/HIF-1 $\alpha^{\text{Tg}}$                 | CCSP <sup>Cre</sup> /LSL-K-ras <sup>G12D</sup> /CCSP-rtTA/<br>HIF-1 $\alpha^{\text{Tg}}$ | Airway Specific K-ras Mutant with HIF-1 $\alpha$ Overexpression |
